# Supplementary material for: Introducing thermo-mechanochemistry of lignin enabled the production of high-quality low-cost carbon fiber
Source: Royal Society of Chemistry journal article supplement (doi:10.1039/d3gc04288j), 2024-01-01
Supplement: d3gc04288j1.pdf [file d3gc04288j1.pdf]

Supplementary Materials for

**Introducing thermo-mechanochemistry of lignin enabled high-quality low-cost carbon fiber**

Yixin Luo<sup>1</sup>, Moham Ed Abdur Razzaq<sup>1</sup>, Wangda Qu<sup>1</sup>, Abdulrahman A. B. A. Mohammed<sup>1</sup>,  
Alvina Aui<sup>1</sup>, Hamidreza Zobeiri<sup>1</sup>, Mark Mba Wright<sup>1</sup>, Xinwei Wang<sup>1</sup>, Xianglan Bai<sup>1, \*</sup>

<sup>1</sup>Department of Mechanical Engineering, Iowa State University, Ames, Iowa 50011 USA

\*Corresponding author. Email: bx19801@iastate.edu.

**This file includes the following:**

Supplementary Text

Tables S1 to S2

Figs. S1 to S7

Supplemental References 1-2

## Supplementary text

### Analysis of CF Raman results

For calculating the  $I_D/I_G$  ratio of CFs, the broad D and G bands in the Raman spectra shown in Fig. 4b & 4c of the main text were deconvoluted into five bands using the Gaussian curve fitting.  $D_1$  peak at  $1360\text{cm}^{-1}$  and the  $D_2$  peak at  $1620\text{cm}^{-1}$  are disordered carbon in hexagonal carbon layers or at the edges of crystallites.  $D_3$  ( $1500\text{ cm}^{-1}$ ) between  $D_1$  and G ( $1580\text{ cm}^{-1}$ ) and  $D_4$  ( $1200\text{ cm}^{-1}$ ) at the left shoulder of the broad D band is derived from  $\text{sp}^2$ -bonded amorphous carbon. The peak area sum of  $D_1$  and  $D_2$  divided by the peak area of G was used to calculate the  $I_D/I_G$  ratio, representing the disordered  $\text{sp}^2$  attached to graphite structures. A lower  $I_D/I_G$  ratio represents a higher ordering and reduced structural defect.

### Analysis of XRD results:

Before calculating crystalline parameters, Gaussian curve fitting was performed on the broad first band to deconvolute the 002 and  $\gamma$  bands. The Bragg and Scherrer formula was used to calculate crystalline parameters, including interlayer spacing ( $d_{002}$ ), stacking height ( $L_c$ ), and lateral length ( $L_a$ ), as shown below:

$$d_{002} = \lambda / 2 \sin \theta$$

$$L = K \lambda / \beta \cos \theta$$

where  $\theta$  is the Bragg angle of the corresponding peak.  $\lambda$  is the wavelength of the X-ray. The constant K is 0.89 for the (002) band and 1.84 for (100).  $\beta$  is the full width at half maximum intensity (FWHM) of the (002) peak and (100) peak.  $\theta$  is the scattering angle of the corresponding peak. The (002) band measured from the parallel scan was used to calculate  $L_c$ , and the (100) band measured from the perpendicular scan was used to calculate  $L_a$ .

### Analysis of SXAS results

The SAXS results (**Fig. S9**) were used to calculate average pore diameters of CF based on a modified form of the Kalliat model<sup>1</sup> for SXAS measurement by McDonald et al.<sup>2</sup> shown below:

$$I(q) = \rho^2 I_{OK} \left[ \frac{A}{q^n} + \frac{C_{mi}}{(1 + b^2 q^2)^2} \right] + bkg$$

$$the R = \sqrt{10b}$$

where  $I(q)$  is the scattering intensity of the fibers,  $\rho$  is the electronic density of graphite.  $I_{OK}$  is a parameter associated with the sample mass, the cross-section area of the sample, and the area of the X-ray beam penetrating the sample.  $q$  is the wave vector, and  $A$  is proportional to the surface area of pores.  $C_{mi}$  is proportional to the volume of pores, and  $b$  is the Debye autocorrelation length of the pores.  $R$  is the radius of the pores, and  $bkg$  is the background.  $n$  is set up as 3 in this study (for scattering from rough fractal surfaces). While CFs have a distribution of pore sizes, it has been proven that a single characteristic pore size is enough for a reasonable fit to the data instead of a distribution of pore sizes<sup>1</sup>.

**Table S1** Lignin characterizations after water purification

|                        | Raw OL | Water washed OL | Raw KL | Water washed KL |
|------------------------|--------|-----------------|--------|-----------------|
| M <sub>w</sub> (g/mol) | 2791   | 3091            | 4580   | 5505            |
| Dispersity             | 4.39   | 3.8             | 4.82   | 4.53            |
| T <sub>g</sub> (°C)    | 95     | 74              | 198    | 156             |
| T <sub>d</sub> (°C)    | 178    | 196             | 269    | 280             |
| Moisture content (%)   | 1.2    | 1.22            | 2.34   | 1.25            |
| Ash content (%)        | 1.4    | 0.07            | 2.59   | 0.55            |
| Fixed carbon (%)       | 37.4   | 38.7            | 38.80  | 39.2            |

T<sub>d</sub>: temperature corresponding to 5% mass loss.

**Table S2.** Elemental composition of AF, NSF, and TSF

|     | C (%)  | H (%) | N (%) | S (%) | O (%)  |
|-----|--------|-------|-------|-------|--------|
| AF  | 67.403 | 5.063 | 0.253 | 0.044 | 27.236 |
| NSF | 64.890 | 3.293 | 0.297 | 0.078 | 31.442 |
| TSF | 64.990 | 3.366 | 0.350 | 0.051 | 31.243 |

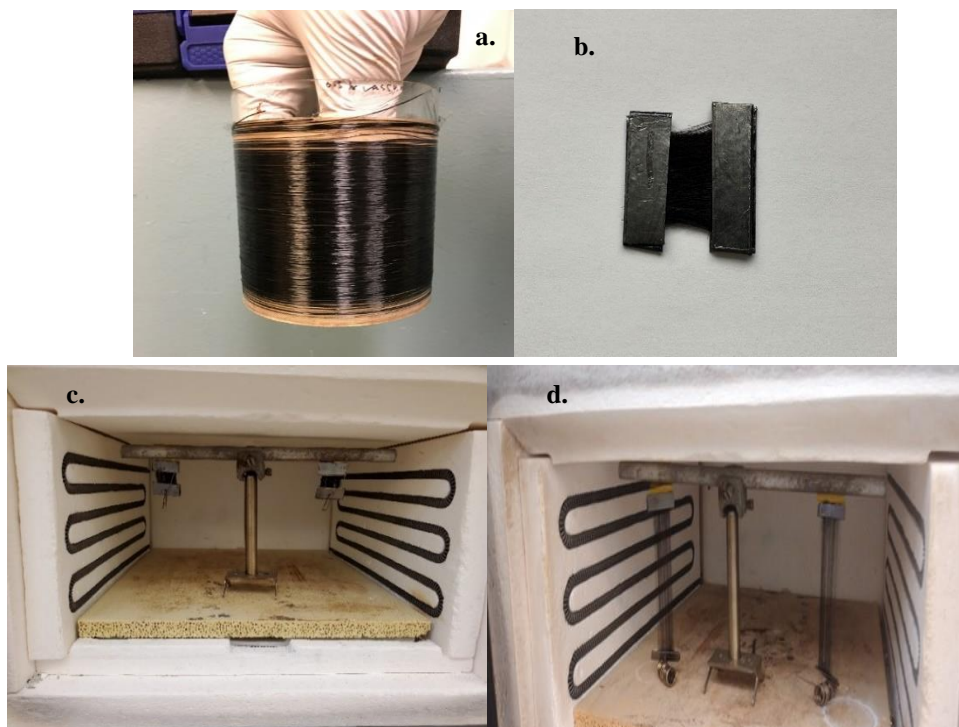

**Figure S1.** Stabilization of melt-spun fibers. **a.** As-spun fiber (AF) spool; **b.** AF fiber bundles prepared for stabilization; **c & d.** adjustable weights are attached to stretch the spun fibers during stabilization.

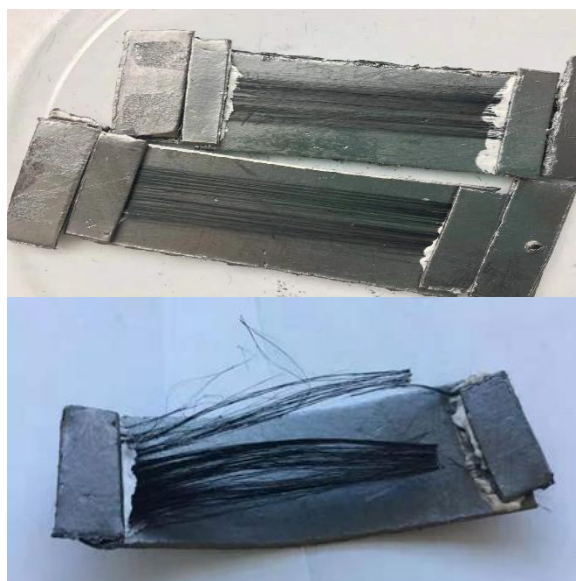

**Figure S2. a.** Stabilized fiber before carbonization; **b.** carbonizing at a constant heating rate of  $7^{\circ}\text{C}/\text{min}$  caused excessive fiber shrinkage to bend the graphene sheet and break the fibers.

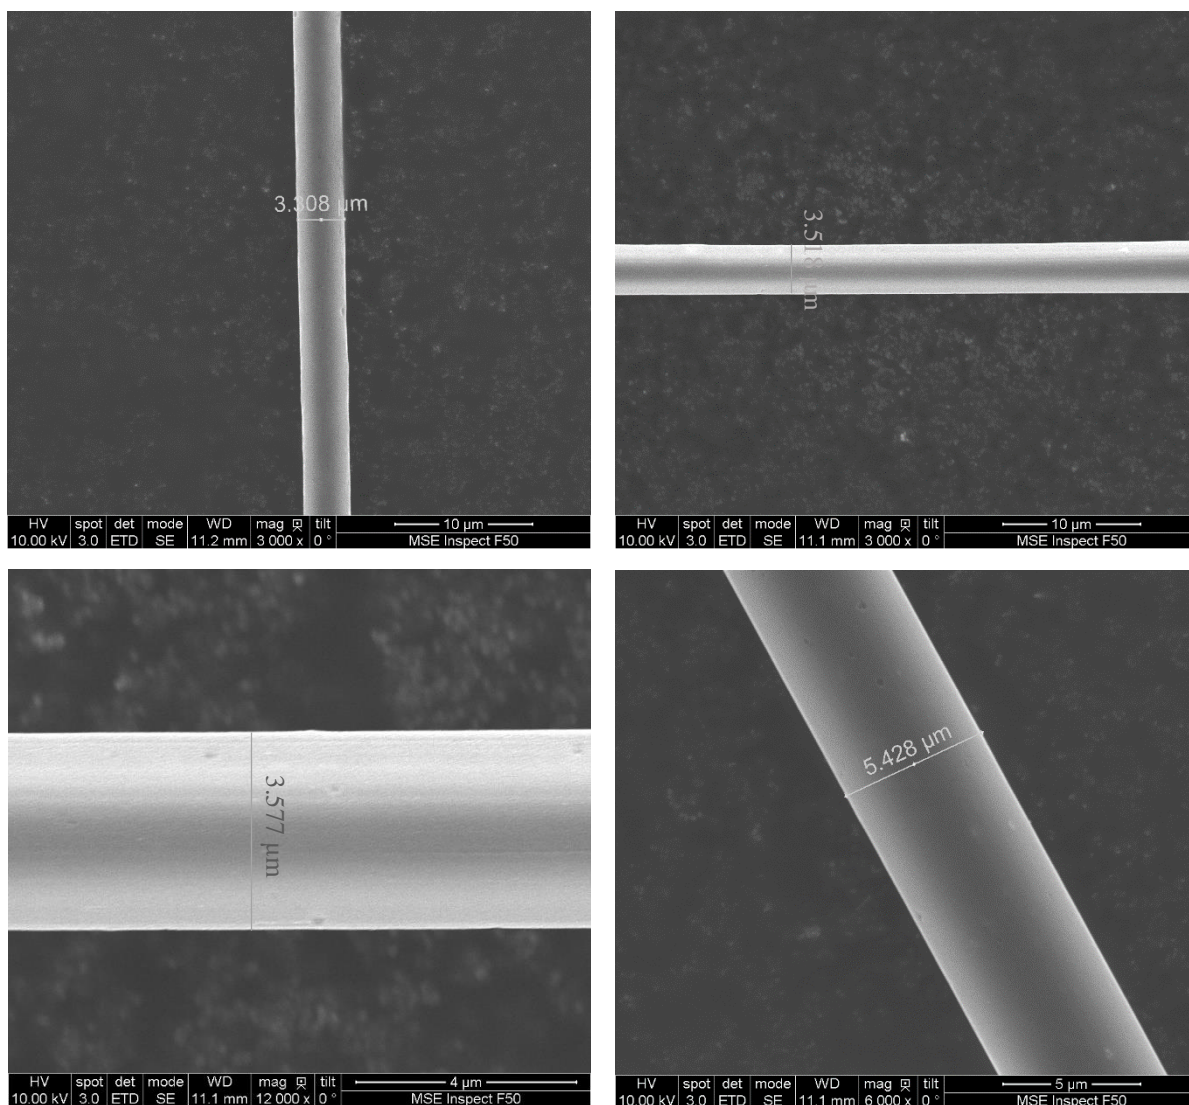

**Figure S3.** SEM images of representative CFs



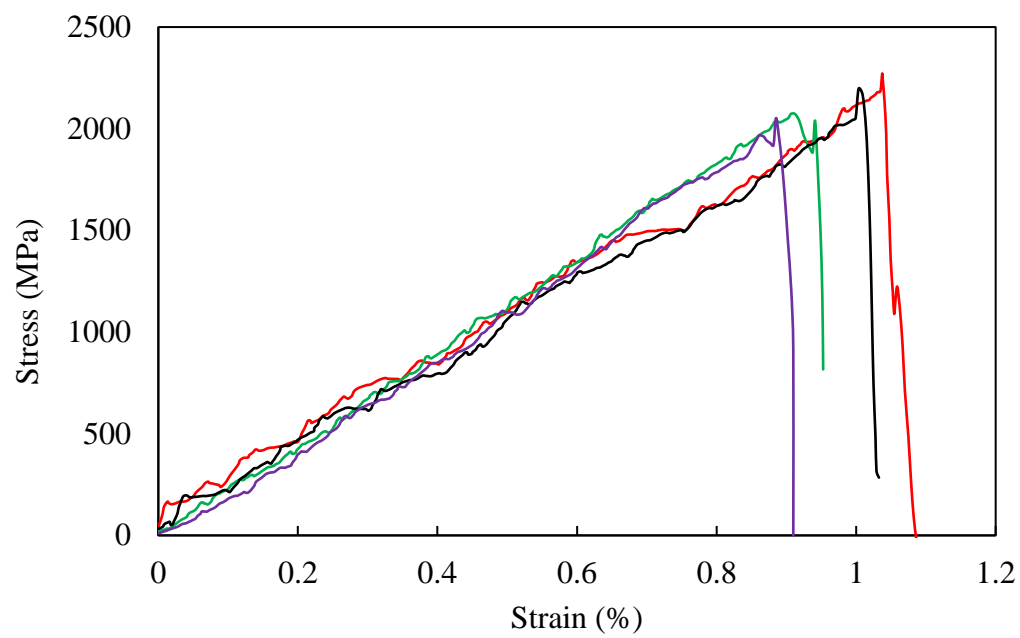

**Figure S4.** Strain-stress curve

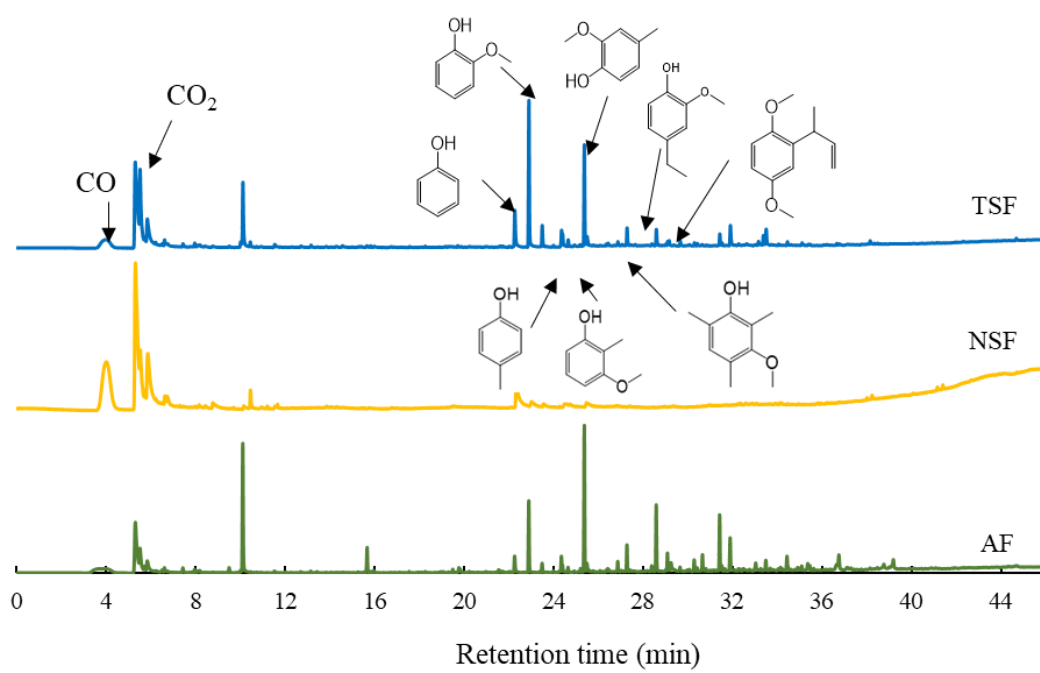

**Figure S5.** Pyrolysis-GC/MS chromatogram of AF, NSF, and TSF.

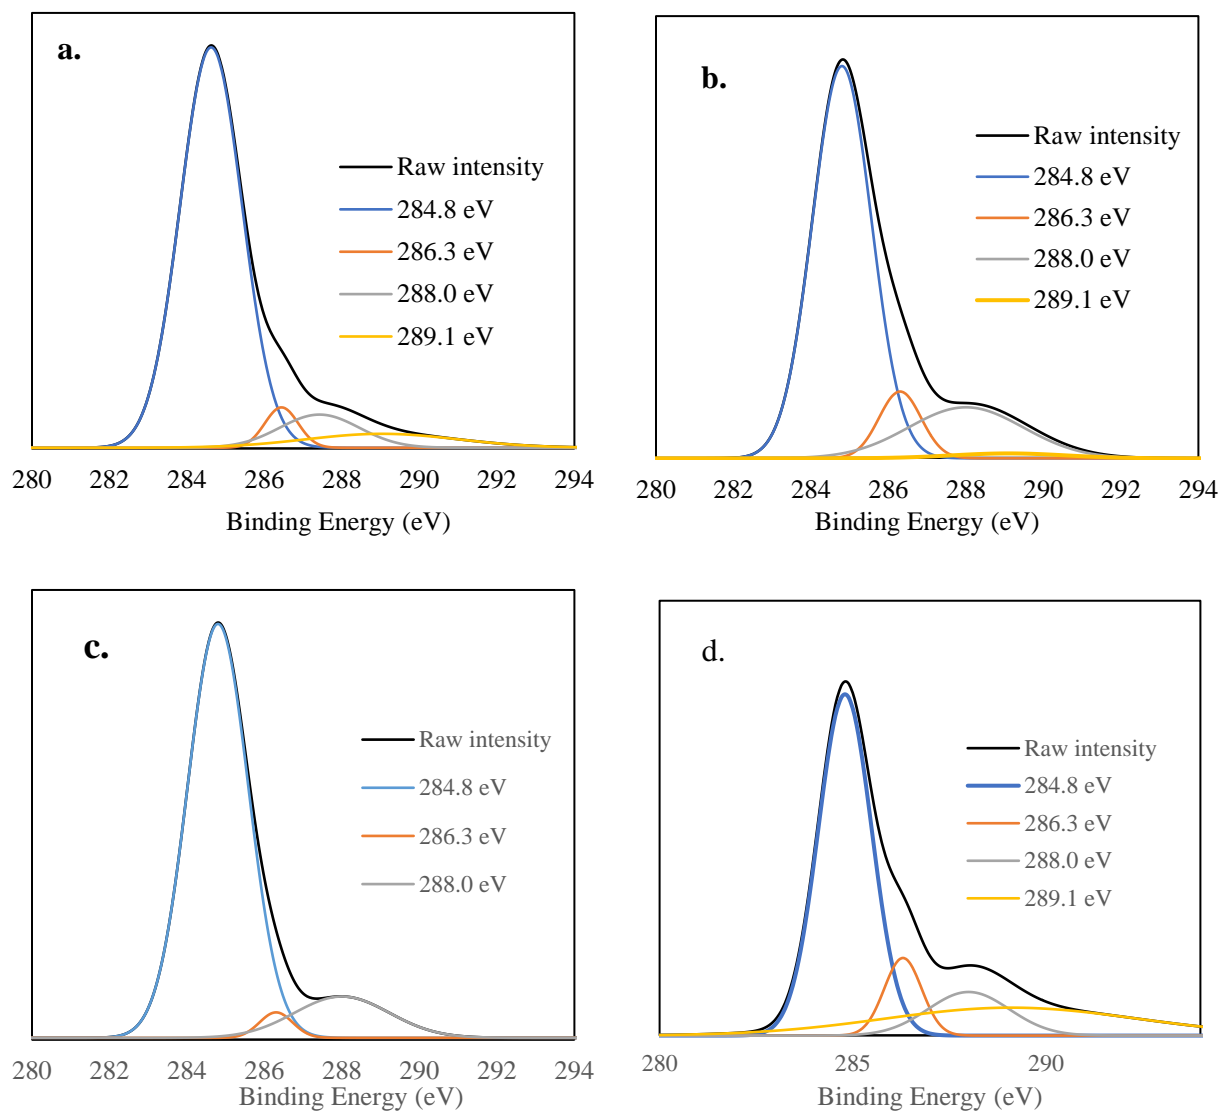

**Figure S6.** Gaussian fitting of XPS spectra of CFs. O. **a.** TCF700; **b.** TCF800; **c.** TCF900; **d.** NCF800. 284.8 eV: -C-C-, -C-H-; 286.3 eV: -C-O-; 288.0 eV: -C=O; 289.1 eV: -O-C=O.

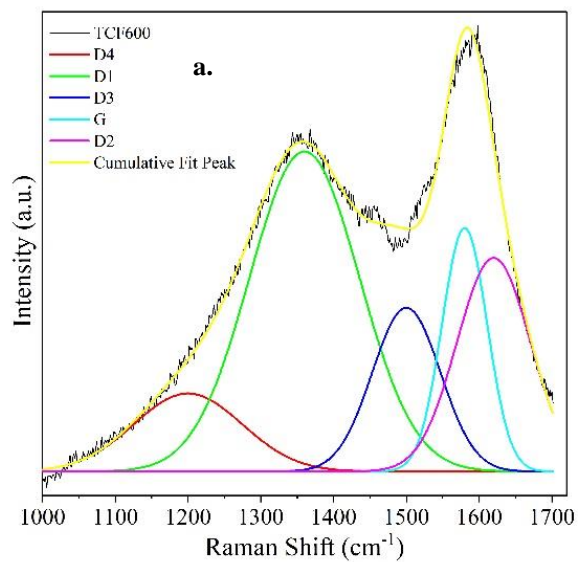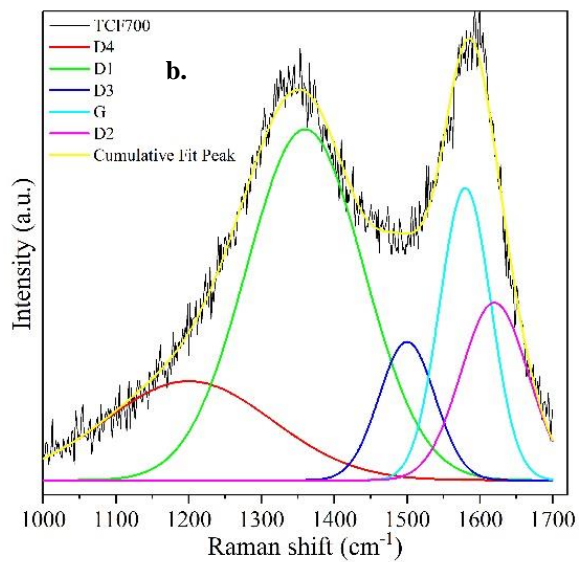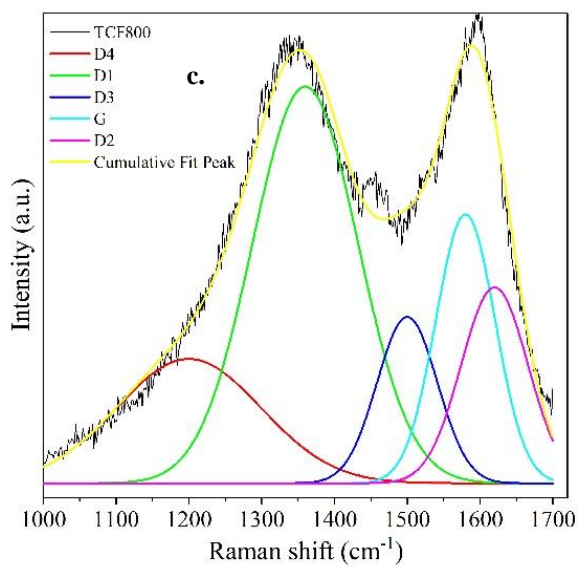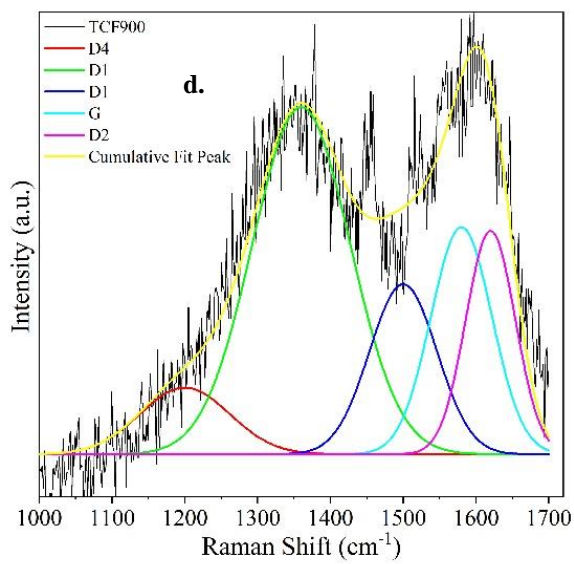

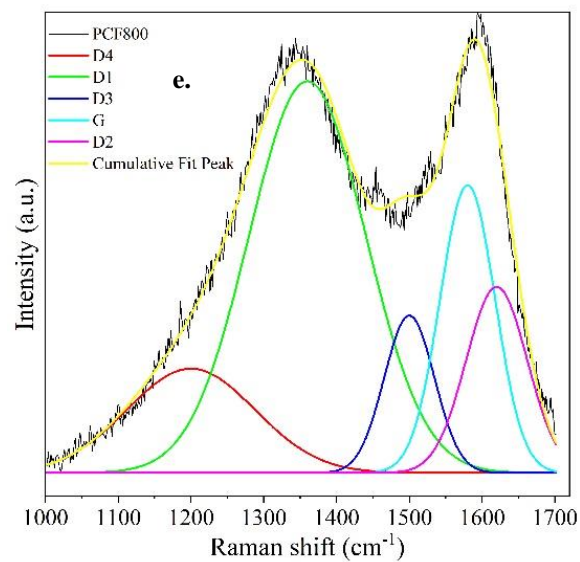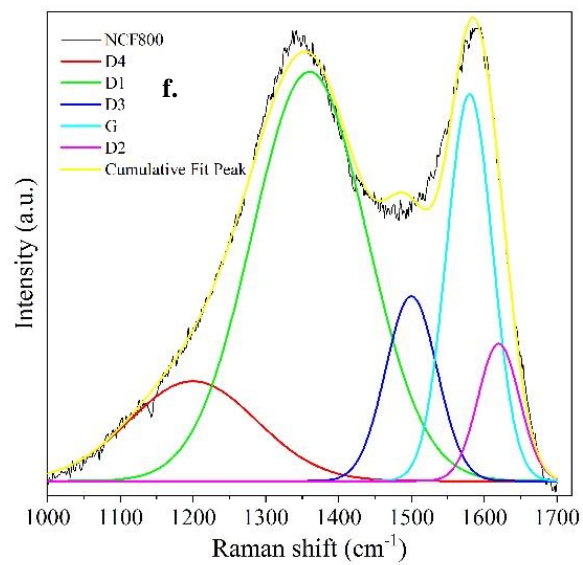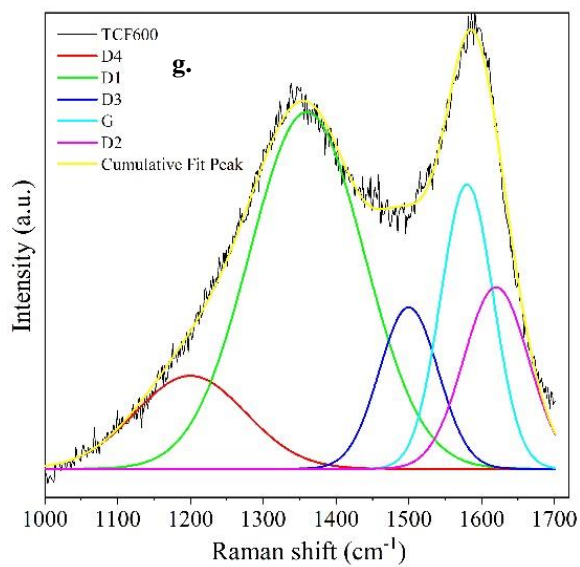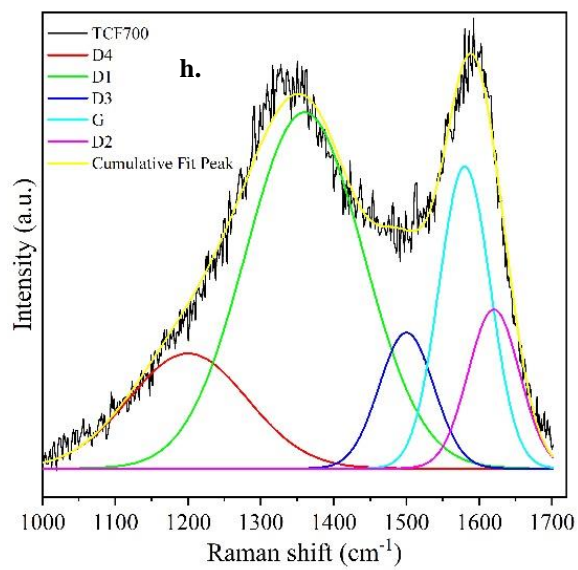

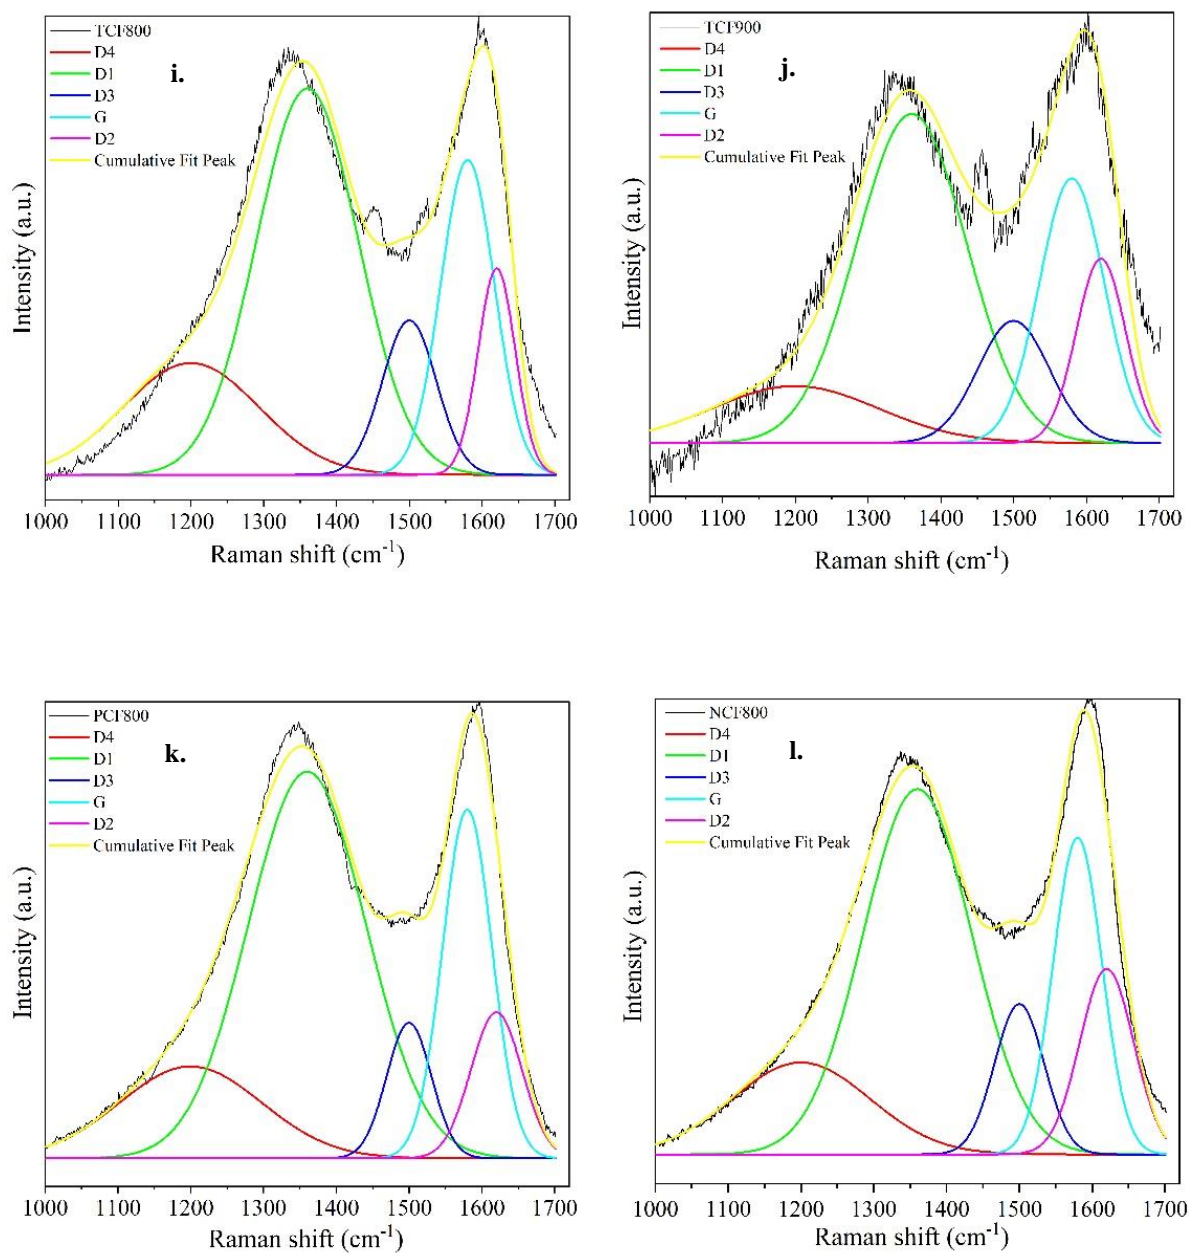

**Figure S7.** Gaussian fitting of Raman spectra of CFs. For the cross-section view spectra: **a.** TCF600; **b.** TCF700; **c.** TCF800; **d.** TCF900; **e.** PCF800; **f.** NCF800. For the top view spectra: **g.** TCF600; **h.** TCF700; **i.** TCF800; **j.** TCF900; **k.** PCF800; **l.** NCF800.

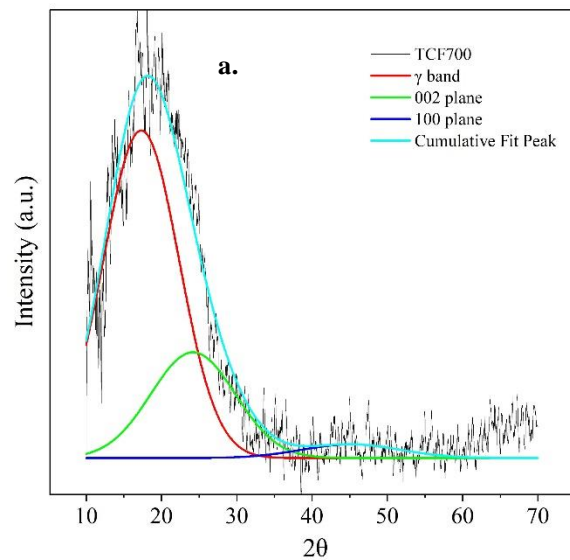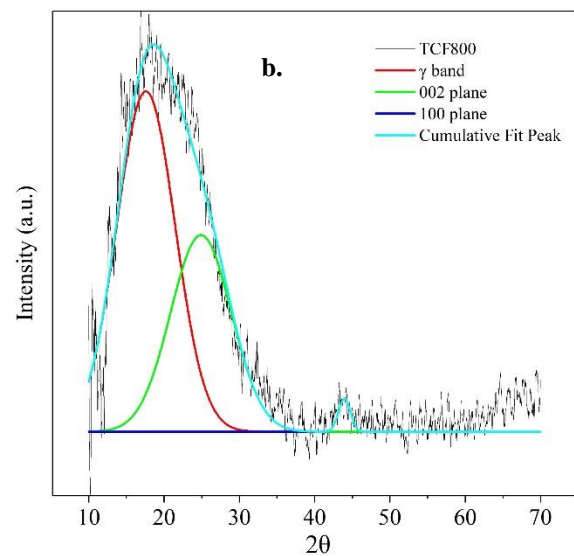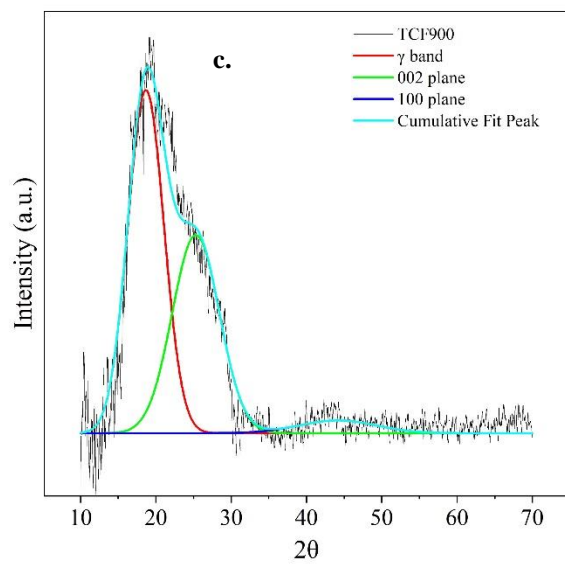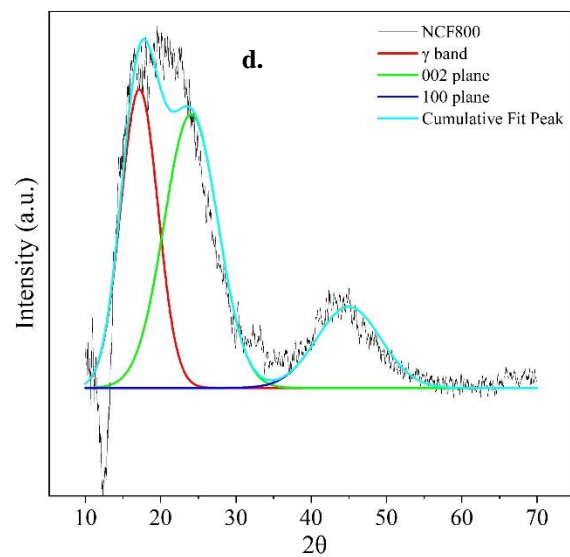



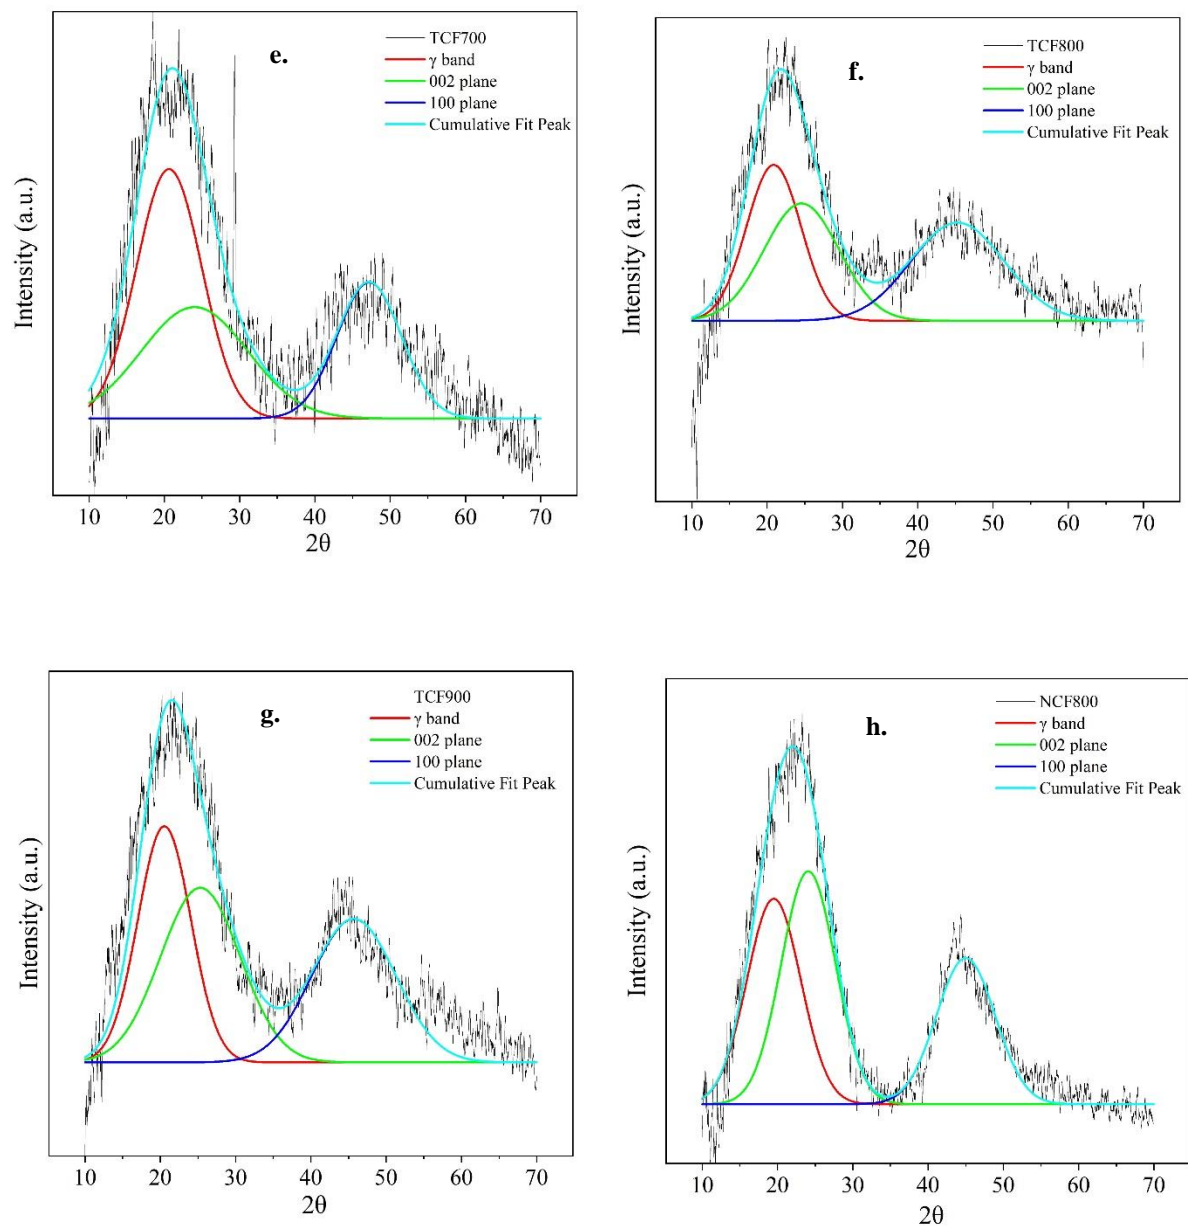

**Figure S8.** Gaussian fitting of XRD spectra of various CFs. For the parallel scan spectra: **a.** TCF700; **b.** TCF800; **c.** TCF900; **d.** NCF800. For the perpendicular scan spectra: **e.** TCF700; **f.** TCF800; **g.** TCF900; **h.** NCF800.



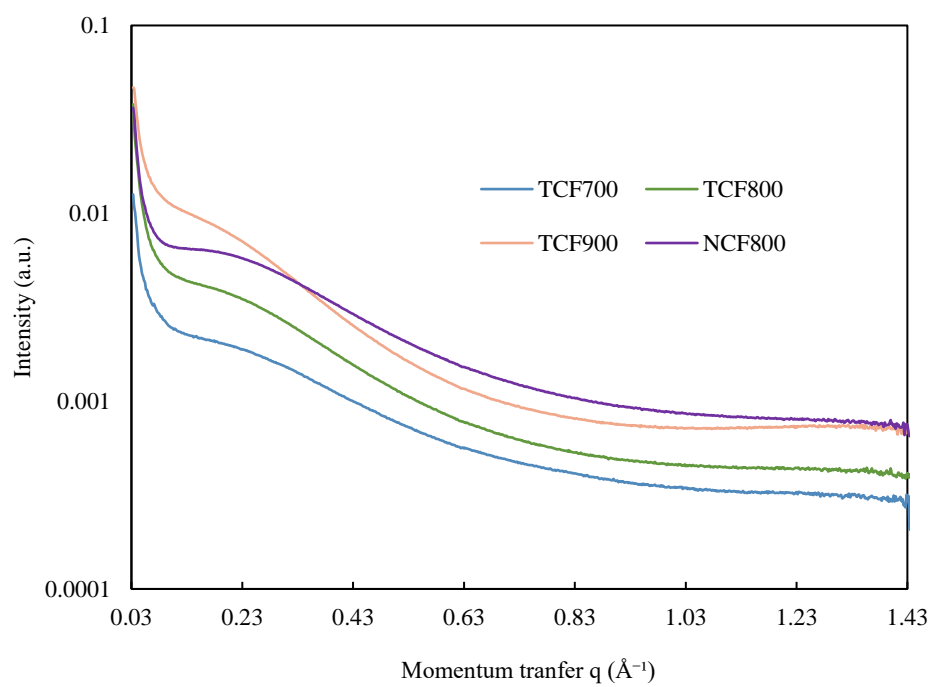

**Figure S9.** SAXR results of CFs.

**Supplemental Material References:**

1. M. Kalliat, C. Y. Kwak, and P. W. Schmidt, Small-angle X-ray investigation of the porosity in coals, *New Approaches in Coal Chemistry* Chapter 1, 3-22, *ACS Symposium Series* 169, ISBN13: 9780841206595 eISBN: 9780841208452, 1981.
2. M. J. McDonald, J. W. H. Smith, and J. R. Dahn, A study of small angle X-ray scattering from impregnated activated carbons, *Carbon* 2014, 68, 452–461, 2014.
